# Supplementary material for: Pharmacokinetics of Haloperidol in Critically Ill Patients: Is There an Association with Inflammation?
Source: MDPI journal article supplement (doi:10.3390/pharmaceutics14030549), 2022-02-28
Supplement: s1 [file s1]

Mw.dr. N.G.M. Hunfeld  
Afd. Intensive Care  
Kamer Na-119  
Erasmus MC

Doorkiesnummer +31 10 7033625/34428  
Faxnummer  
Kamernummer Z 514  
E-mail [metc@erasmusmc.nl](mailto:metc@erasmusmc.nl)  
Ons kenmerk MdV/hl/215531  
Datum 21 juli 2014

**Betreft:** MEC-2014-264 Positief besluit NL48875.078.14 v05

**Titel onderzoek:**

'Pharmacologic Evaluation of Intravenous Haloperidol for the Treatment of Delirium in Critically Ill Adults'

*Verrichter: Erasmus MC  
Singlecenter*

**Postadres**  
Postbus 2040  
3000 CA Rotterdam

**Bezoekadres**  
's Gravendijkwal 230  
3015 CE Rotterdam

Geachte mevrouw Hunfeld,

De Medisch Ethische Toetsings Commissie Erasmus MC (METC) heeft het bovengenoemde onderzoeksvoorstel ontvangen op 6 mei 2014.

**Voorzitters**  
Prof.dr. H.W. Tilanus  
Prof.dr. H.J. Metselaar

**Vice voorzitter**  
Dr. C.M. Zwaan

**Besluit**

De commissie heeft het onderzoeksvoorstel in het kader van de Wet medisch-wetenschappelijk onderzoek met mensen (WMO) besproken in de 952<sup>e</sup> vergadering d.d. 20 mei 2014. Naar aanleiding van deze toetsing heeft de commissie u enkele vragen c.q. opmerkingen voorgelegd. De vragen en opmerkingen zijn naar tevredenheid beantwoord.

**Secretarissen**  
Mw. mr. C.P. Bron-  
van Vliet  
Mw.dr.ir. M.M.C. de Vries-  
Velraeds  
Mw.ing. W.C.M. Tielemans  
Drs. H. van der Baan (a.i.)

De commissie oordeelt **positief** over de uitvoering van het onderzoek in het volgende centrum:

- Erasmus MC te Rotterdam

**Secretaressen**  
Mw. A. de Jong  
Mw. S. Sneevliet  
Mw.drs. H.L. Lammers-Assems

Alvorens met de uitvoering van het onderzoek in het Erasmus MC gestart mag worden, dient u in het bezit te zijn van toestemming voor de uitvoering van het onderzoek door het afdelingshoofd.

**Adm. medewerker**  
Mw. A.E. van Huuksloot

**WMO proefpersonenverzekering**

De commissie verleent ontheffing van de verplichting een verzekering af te sluiten, die de door het onderzoek veroorzaakte schade van de proefpersoon dekt. De commissie is van oordeel dat aan dit onderzoek voor de proefpersoon naar zijn aard hooguit verwaarloosbare/geen risico's zijn verbonden.

Het secretariaat is  
geopend van maandag  
tot en met vrijdag  
van 08.30 tot 17.00 uur

**Melden**

De volgende gegevens moeten aan de commissie worden gemeld:

- Startdatum (datum waarop de eerste proefpersoon is geïncludeerd)
- Einde inclusie (datum waarop de laatste proefpersoon is geïncludeerd)

- Einddatum (datum waarop de laatste meting bij de laatste proefpersoon heeft plaatsgevonden)

### **Voorleggen ter beoordeling**

De volgende documenten moeten aan de commissie ter beoordeling worden voorgelegd:

- Onverwachte en ernstige bijwerkingen via portal ToetsingOnline
- Amendementen en/of addenda
- Formulier Jaarlijkse voortgangsrapportage, voor het eerst één jaar na dit besluit
- Publicaties en eindrapport

### **BROK cursus**

Voorts wijst de commissie de onderzoekers erop dat, conform landelijke afspraken, klinisch onderzoekers verplicht zijn de 'Basiscursus regelgeving en organisatie van klinisch onderzoek' (BROK) te doorlopen en het bijbehorende certificaat te behalen. De commissie gaat ervan uit dat, indien dit nu nog niet het geval is, de klinisch onderzoekers van deze studie maximaal 6 maanden na aanvang van de studie aan deze verplichting voldaan hebben. Voor informatie over de BROK-cursusdata kunt u contact opnemen met het Congresbureau, intern tel.nr. 43584.

### **Beroep**

Tot slot wijs ik u erop, dat op grond van artikel 23 van de Wet medisch-wetenschappelijk onderzoek met mensen juncto artikel 7: 1 van de Algemene wet bestuursrecht, degene wiens belang rechtstreeks bij dit besluit is betrokken daartegen binnen zes weken na de dag waarop dit besluit bekend is gemaakt, een administratief beroepschrift kan indienen bij de Centrale Commissie Mensgebonden Onderzoek. Een dergelijk administratief beroepschrift dient u te adresseren aan: CCMO, Postbus 16302, 2500 BH Den Haag.

### **Geldigheid besluit**

De commissie heeft de bevoegdheid haar positieve besluit in te trekken als vaststaat dat de uitvoering van het onderzoek ernstig tekortschiet. Het positieve besluit van de commissie verliest geldigheid als met de uitvoering van het onderzoek niet is begonnen binnen één jaar nadat dit besluit is genomen.

Met vriendelijke groet,  
namens de Medisch Ethische Toetsings Commissie Erasmus MC,



Mw.dr.ir. M.M.C. de Vries-Velraeds  
Secretaris

### Beoordeelde documenten

- Aanbiedingsbrief en akkoordverklaring hoofdonderzoeker, mw.dr. N.G.M. Hunfeld, en afdelingshoofd, dr. D.A.M.P.J. Gommers, zoals ontvangen d.d. 6 mei 2014;
- ABR-formulier NL48875.078.14 versie 05 d.d. 7 juli 2014;
- Addendum bij ABR-formulier, zoals ontvangen d.d. 6 mei 2014;
- Onderzoeksprotocol, versie 3.0 d.d. juli 2014;
- Delirium protocol, versie 2 d.d. 18 februari 2014;
- SPC Haldol, 10 mg tabletten, 2 mg/ml druppels, 5 mg/ml oplossing voor injectie, herzien d.d. 13 juni 2013;
- Patiënteninformatie- en toestemmingsformulier patiënt, versie 3.0 d.d. 15 juli 2014;
- Patiënteninformatie- en toestemmingsformulier patiënt na wettelijk vertegenwoordiger, versie 3.0 d.d. 15 juli 2014;
- Informatie- en toestemmingsformulier wettelijk vertegenwoordiger, versie 3.0 d.d. 15 juli 2014;
- Informatie waaruit blijkt dat ontheffing van de verzekeringsplicht kan worden verleend;
- Verzekeringscertificaat d.d. 16 maart 2012 inzake aansprakelijkheidsverzekering Erasmus MC;
- Curriculum vitae onafhankelijke arts prof.dr. T. van Gelder, getekend d.d. 25 april 2014;
- Curriculum vitae hoofdonderzoeker mw.dr. N.G.M. Hunfeld, getekend d.d. 25 april 2014; en
- Monitoringplan 'verwaarloosbaar risico' inclusief bijlage A, getekend d.d. 25 april 2014.

### Samenstelling METC Erasmus MC:

|                                      |                                          |
|--------------------------------------|------------------------------------------|
| Dr. K.M. Akkerhuis                   | Cardioloog                               |
| Dr. P.A.W. te Boekhorst              | Internist-hematoloog                     |
| Prof.dr. A.H.J. Danser               | Klinisch farmacoloog                     |
| Dr.ir. M.T. Hilhorst                 | Ethicus                                  |
| Prof.dr. H.J. Metselaar (voorzitter) | Internist / MDL-arts                     |
| Dr. R. Timman                        | Methodoloog                              |
| Mw.mr. C.F.B. Verhagen-van Weerden   | Gezondheidsjurist                        |
| Mw.dr.ir. M.M.C. de Vries-Velraeds   | Secretaris                               |
| Prof.dr. A.G. Vulto                  | Ziekenhuisapotheker/klinisch farmacoloog |
| Mw.dr. S.N. de Wildt                 | Kinderarts                               |
| Mw.drs. S.E. Zijlstra                | Invalshoek proefpersoon / Extern lid     |

**Bijlage**      Certificaat d.d. 16 maart 2012 inzake aansprakelijkheidsverzekering Erasmus MC

**Cc.**            **Digitale verzending:**  
Dr. D.A.M.P.J. Gommers  
CCMO

MEC-2014-264

singelecenter, geldt uitsluitend voor het Erasmus MC

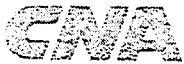

**CERTIFICAAT VAN VERZEKERING**  
**MEDISCHE AANSPRAKELIJKHEID**

Polisnummer : NLAMT00081

Ondergetekende verzekert:

Verzekeringnemer : Erasmus Universitair Medisch Centrum  
's-Gravendijkwal 230  
3015 CE Rotterdam

Verzekerde hoedanigheid : Universitair Medisch Centrum in de breedste zin  
van het woord

Verzekerd bedrag : Zaak- en letselschade  
€ 2.500.000,- per aanspraak en  
€ 10.000.000,- per jaar

Verlies van documenten (sublimiet)  
€ 2.500.000,- per aanspraak en  
€ 10.000.000,- per jaar

Opzichtschaade (sublimiet)  
€ 2.500.000,- per aanspraak en  
€ 10.000.000,- per jaar

Zuivere vermogensschade (sublimiet)  
€ 2.500.000,- per aanspraak en  
€ 10.000.000,- per jaar

Verzekeringstermijn : Deze verzekering is gesloten aanvangende  
1 januari 2012 voor een periode van 36 maanden,  
nader omschreven in de clausule  
verzekeringstermijn

Dekkingsgebied : Wereldwijd, exclusief USA/Canada

Verder overeenkomstig alle voorwaarden en condities als omschreven in de polis met  
Polisnummer NLAMT00081

Amsterdam, 16 maart 2012

CNA Insurance Company Ltd.

**CNA**

21 juli 2014  
Mw.dr.ir. M.M.C. de Vries-Velraeds  
secretaris Medisch Ethische Toetsingscommissie  
Erasmus MC  
Rotterdam

*M. de Vries-Velraeds*
